# Supplementary material
Source: publisher site journal article supplement (https://www.dovepress.com/article/308963)
Supplement: Supplementary file 1 [file get_supplementary_file.php]

**Table 1**.Primers used for real-time PCR.

| ***Gene*** | ***Forward (5’-3’)*** | ***Reverse (5’-3’)*** |
| --- | --- | --- |
| IL-6 | CCGGAGAGGAGACTTCACAG | TCCACGATTTCCCAGAGAAC |
| IL-1β | CTGTGACTCGTGGGATGATG | GGGATTTTGTCGTTGCTTGT |
| TNF-α | TGCCTCAGCCTCTTCTCATT | GCTTGGTGGTTTGCTACGAC |
| IL-10 | GCTCTTACTGACTGGCATGAG | CGCAGCTCTAGGAGCATGTG |
| TGF-β | TGCTTCAGCTCCACAGAGAA | TGGTTGTAGAGGGCAAGGAC |
| Bax | TGCAGAGGATGATTGCTGAC | GATCAGCTCGGGCACTTTAG |
| Bcl-2 | GTACCTGAACCGGCATCTG | GCTGAGCAGGGTCTTCAGAG |
| IDO | CAGCTTCTCCTGCAATCAAAGCA | TGCGAGGTGGAACTTTCTCACAGA |
| IFN-γ | ATGAACGCTACACACTGCATC | CCATCCTTTTGCCAGTTCCTC |
| IL-12 | ATCGTTTTGCTGGTGTCTCC | CTTTGTGGCAGGTGTACTGG |
| Foxp3 | TCAAAGAGCCCTCACAACCAGCTA | TTTGAAGGTTCCAGTGCTGTTGC |
| IL-17A | TGTGAAGGTCAACCTCAAAGTCT | GAGGGATATCTATCAGGGTCTTCAT |
| GAPDH | GTGCTGAGTATGTCGTGGAG | GTCTTCTGAGTGGCAGTGAT |

All these primers were synthesized by Tsingke in Wuhan. RT-PCR indicates real-time polymerase chain reaction; IL, interleukin; TNF-α, tumor necrosis factor-α; TGF-β, transforming growth factor-β; IDO, indolamine 2, 3-dioxygenase; IFN-γ, interferon-γ.
